# Supplementary material for: Structural insights into trans-histone regulation of H3K4 methylation by unique histone H4 binding of MLL3/4
Source: PubMed Central journal article supplement (PMC6318328; doi:10.1038/s41467-018-07906-3), 2019-01-03
Supplement: 41467_2018_7906_MOESM1_ESM.pdf [file 41467_2018_7906_MOESM1_ESM.pdf]

## Supplementary Information

Structural insights into trans-histone regulation of H3K4  
methylation by unique histone H4 binding of MLL3/4

Liu, et al.

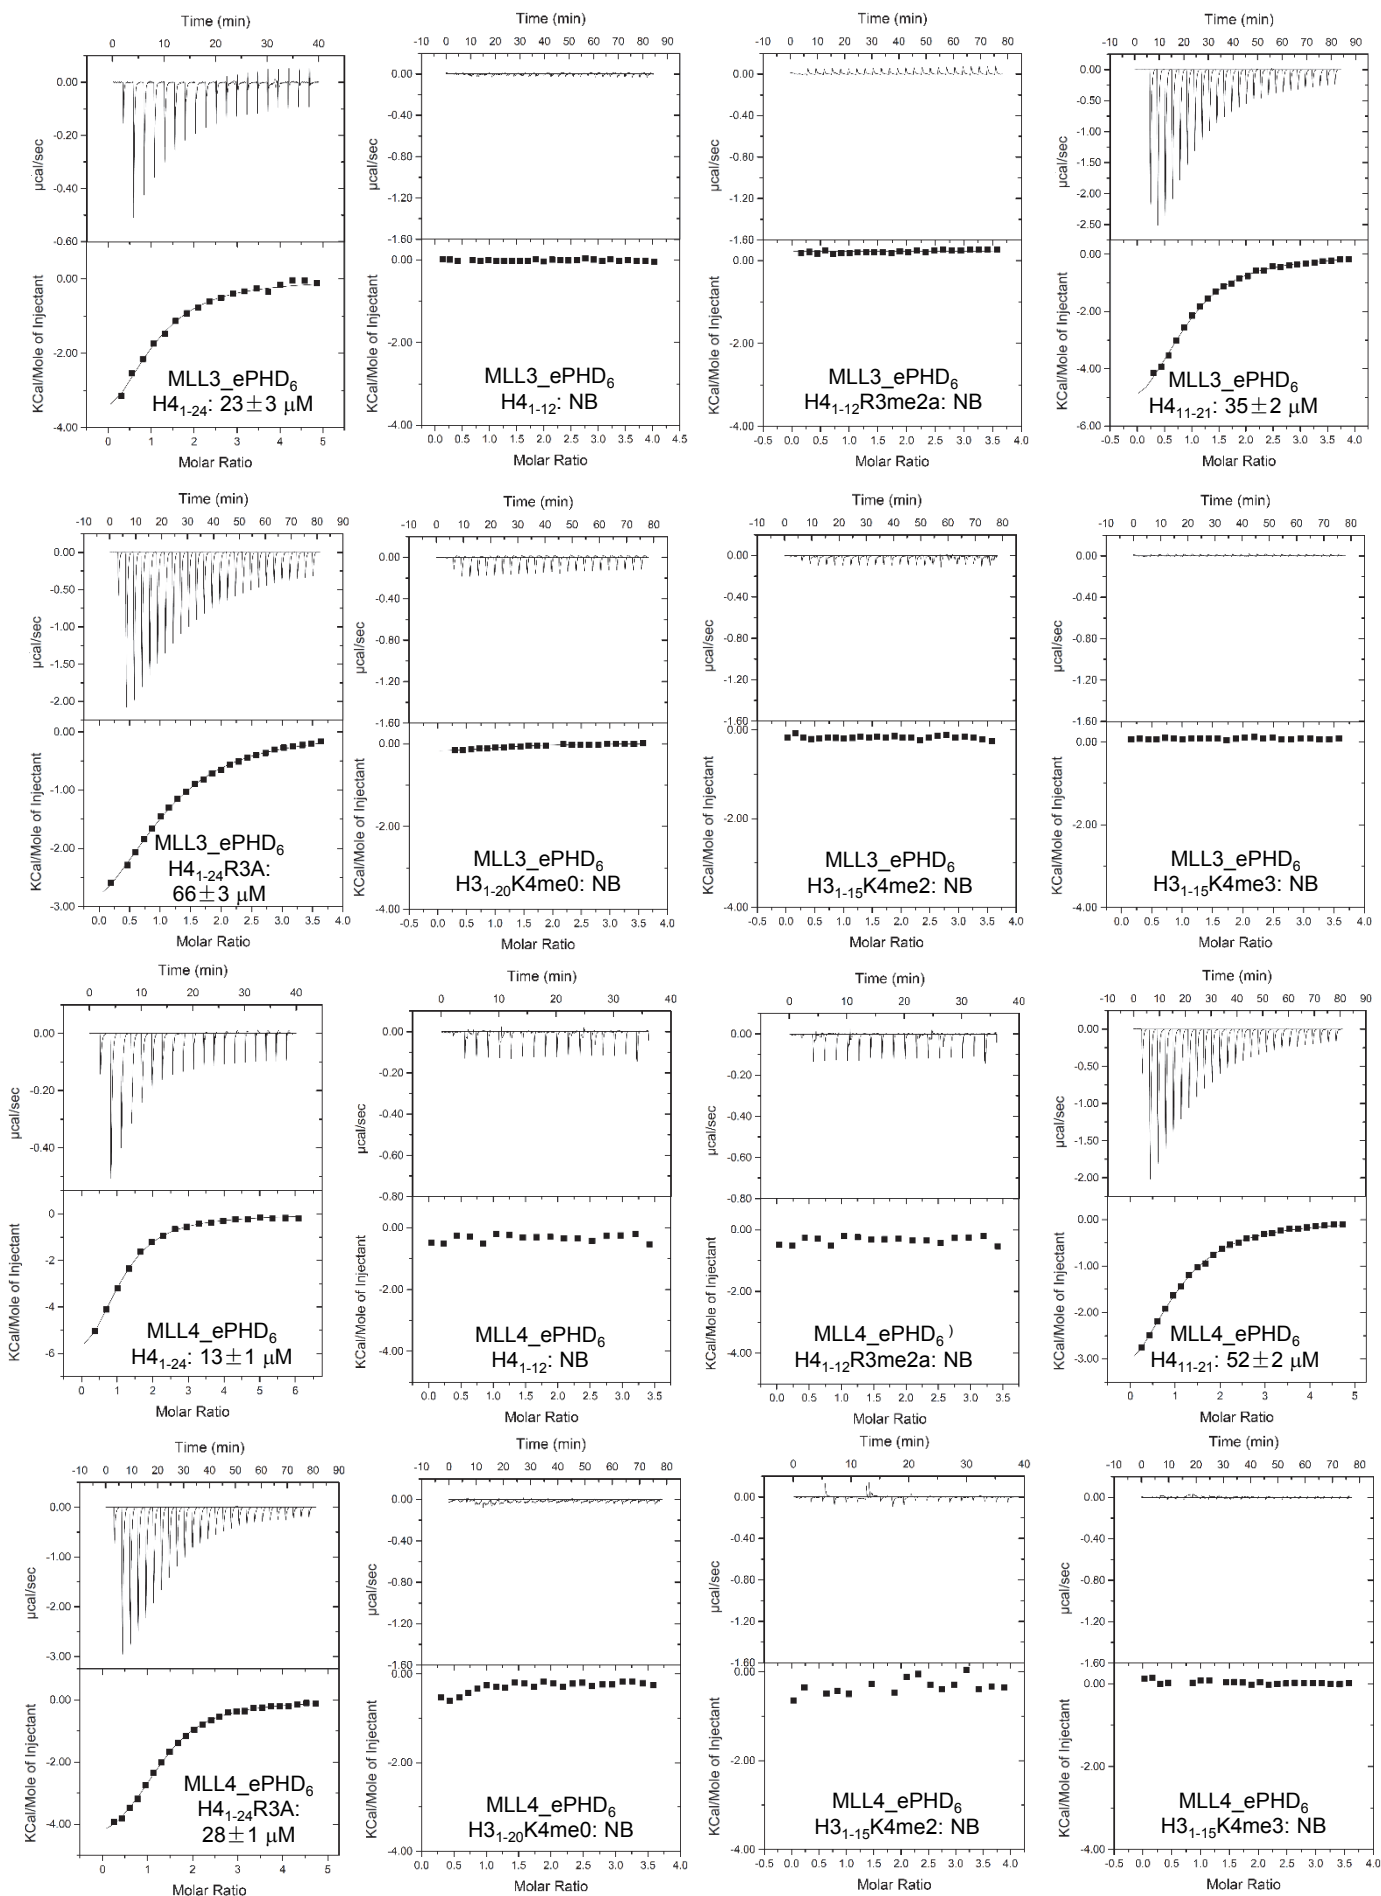

**Supplementary Fig. 1 ITC titration curves for different histone peptides to the extended PHD<sub>6</sub> domains (ePHD<sub>6</sub>) of MLL3 and MLL4. NB: no detectable binding. Related to Table 1.**

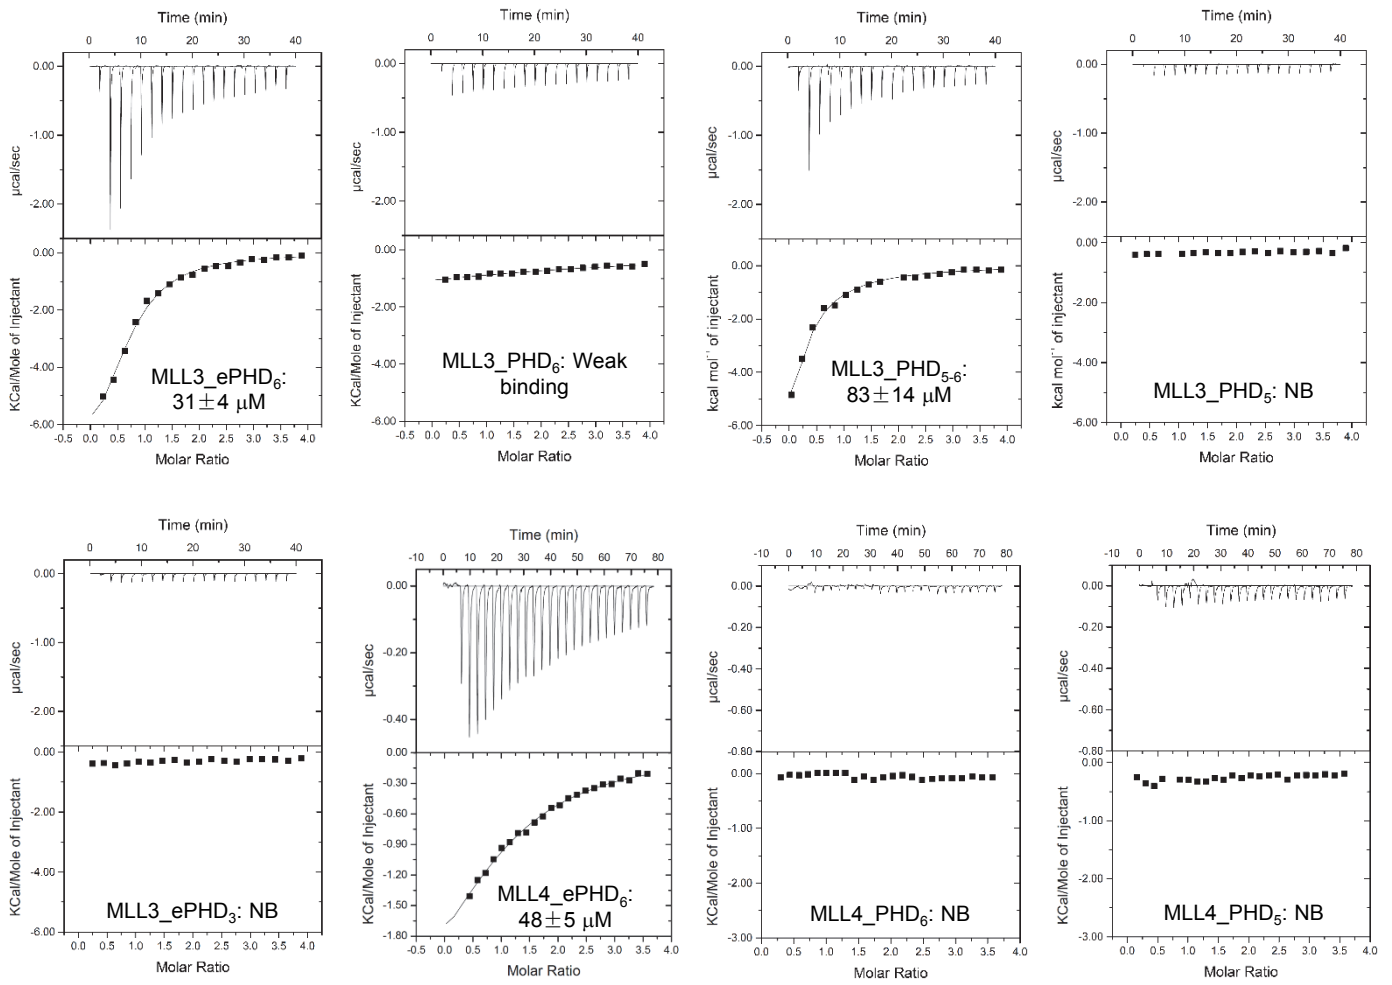

**Supplementary Fig. 2 ITC titration curves for different MLL3 or MLL4 constructs to the histone H4 peptide H4<sub>11-21</sub>. NB: no detectable binding. Related to Table 2.**

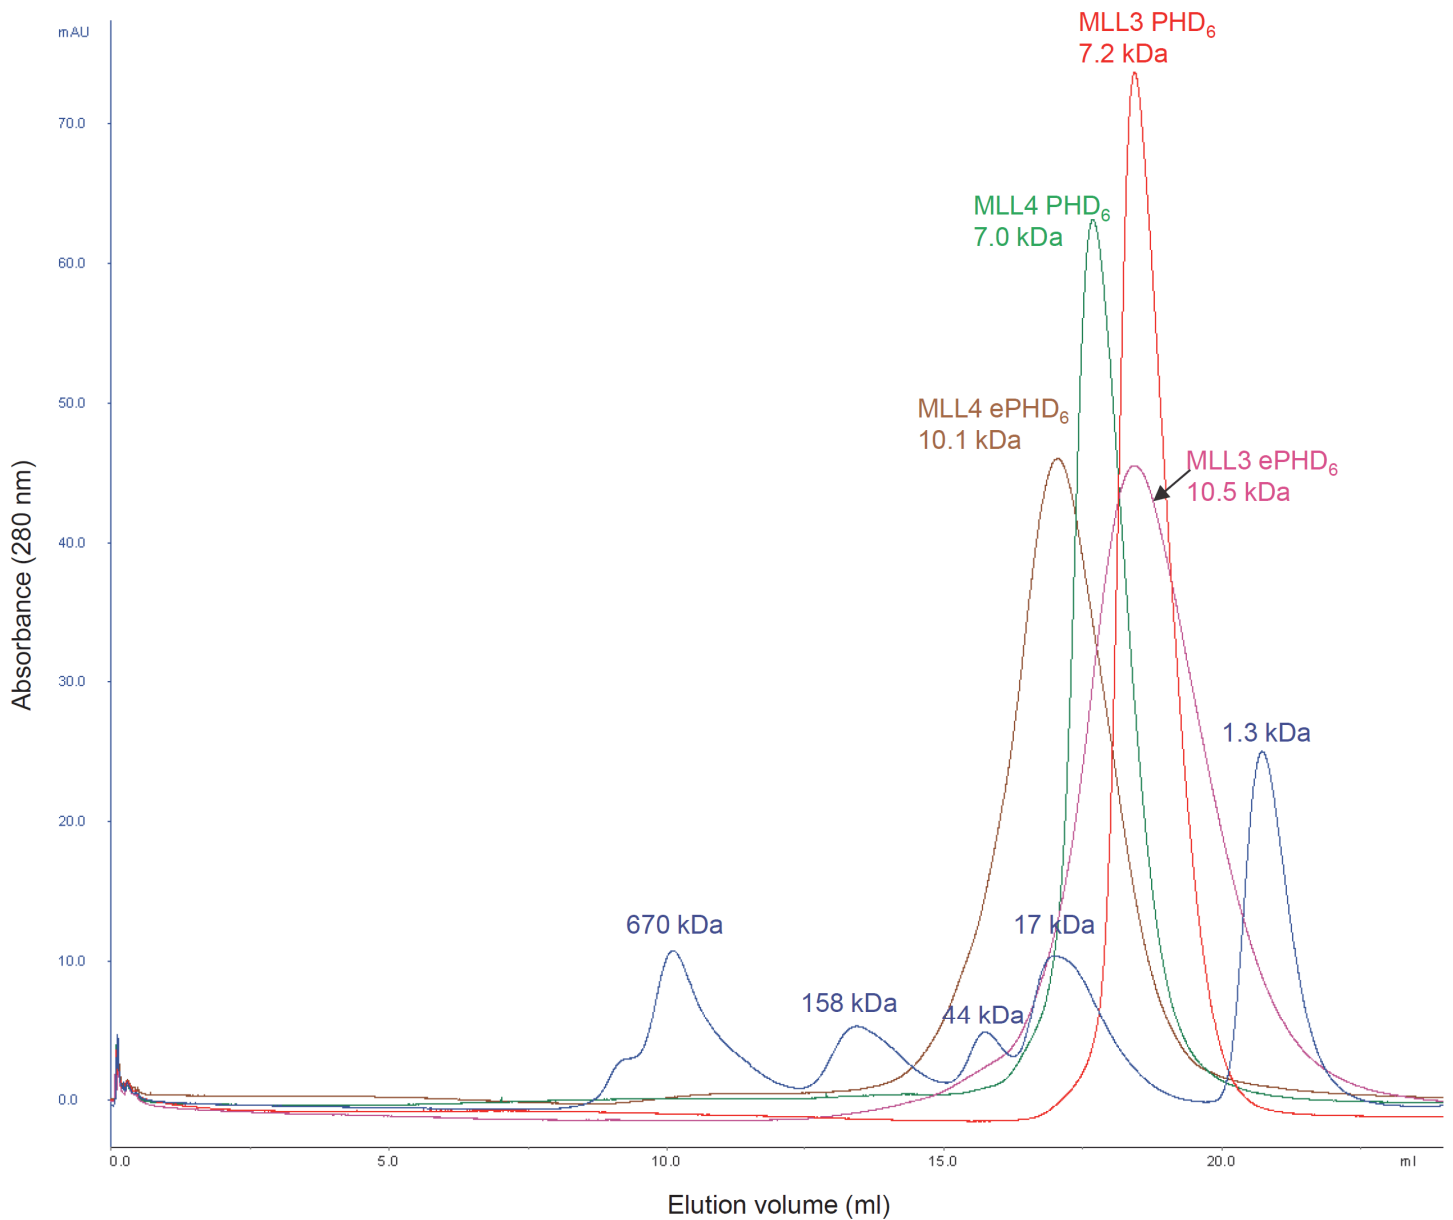

**Supplementary Fig. 3 Superimposition of gel-filtration curves of PHD<sub>6</sub> and ePHD<sub>6</sub> domains of MLL3 and MLL4.** Gel filtration chromatography of MLL3 ePHD<sub>6</sub> (red), PHD<sub>6</sub> (pink), MLL4 ePHD<sub>6</sub> (brown), PHD<sub>6</sub> (green) and protein molecular weight standards (blue, Bio-Rad). Samples were loaded to the Superdex200 10/300 GL (GE Healthcare) column in the buffer containing 20 mM Tris, pH 7.5, 150 mM NaCl, 50 μM ZnCl<sub>2</sub>, and 1 mM DTT.

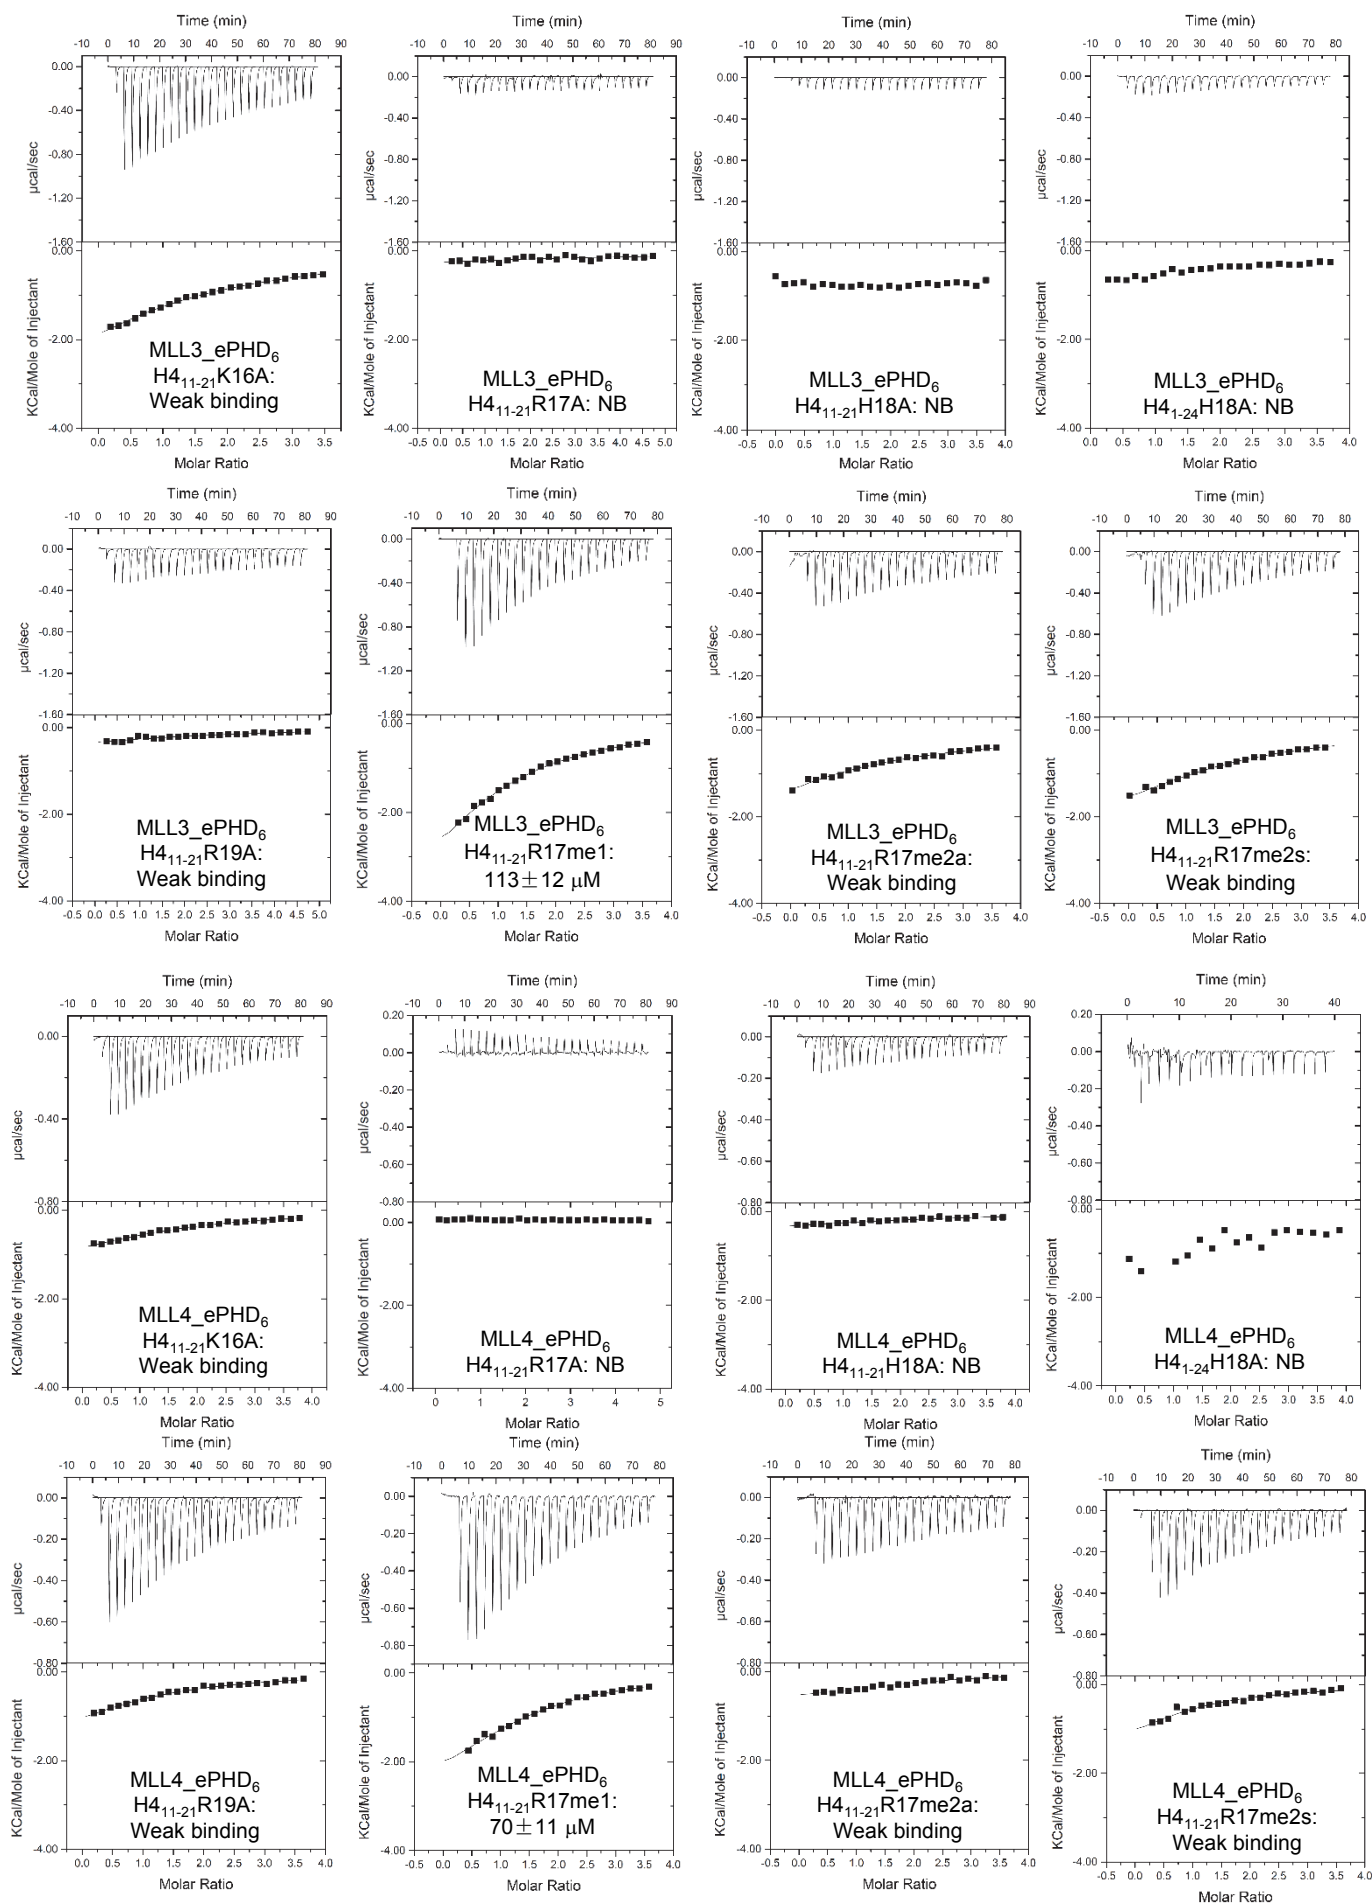

**Supplementary Fig. 4 ITC titration curves for different histone H4 mutant peptides to the extended PHD<sub>6</sub> domains (ePHD<sub>6</sub>) of MLL3 and MLL4. NB: no detectable binding. Related to Fig. 2h.**

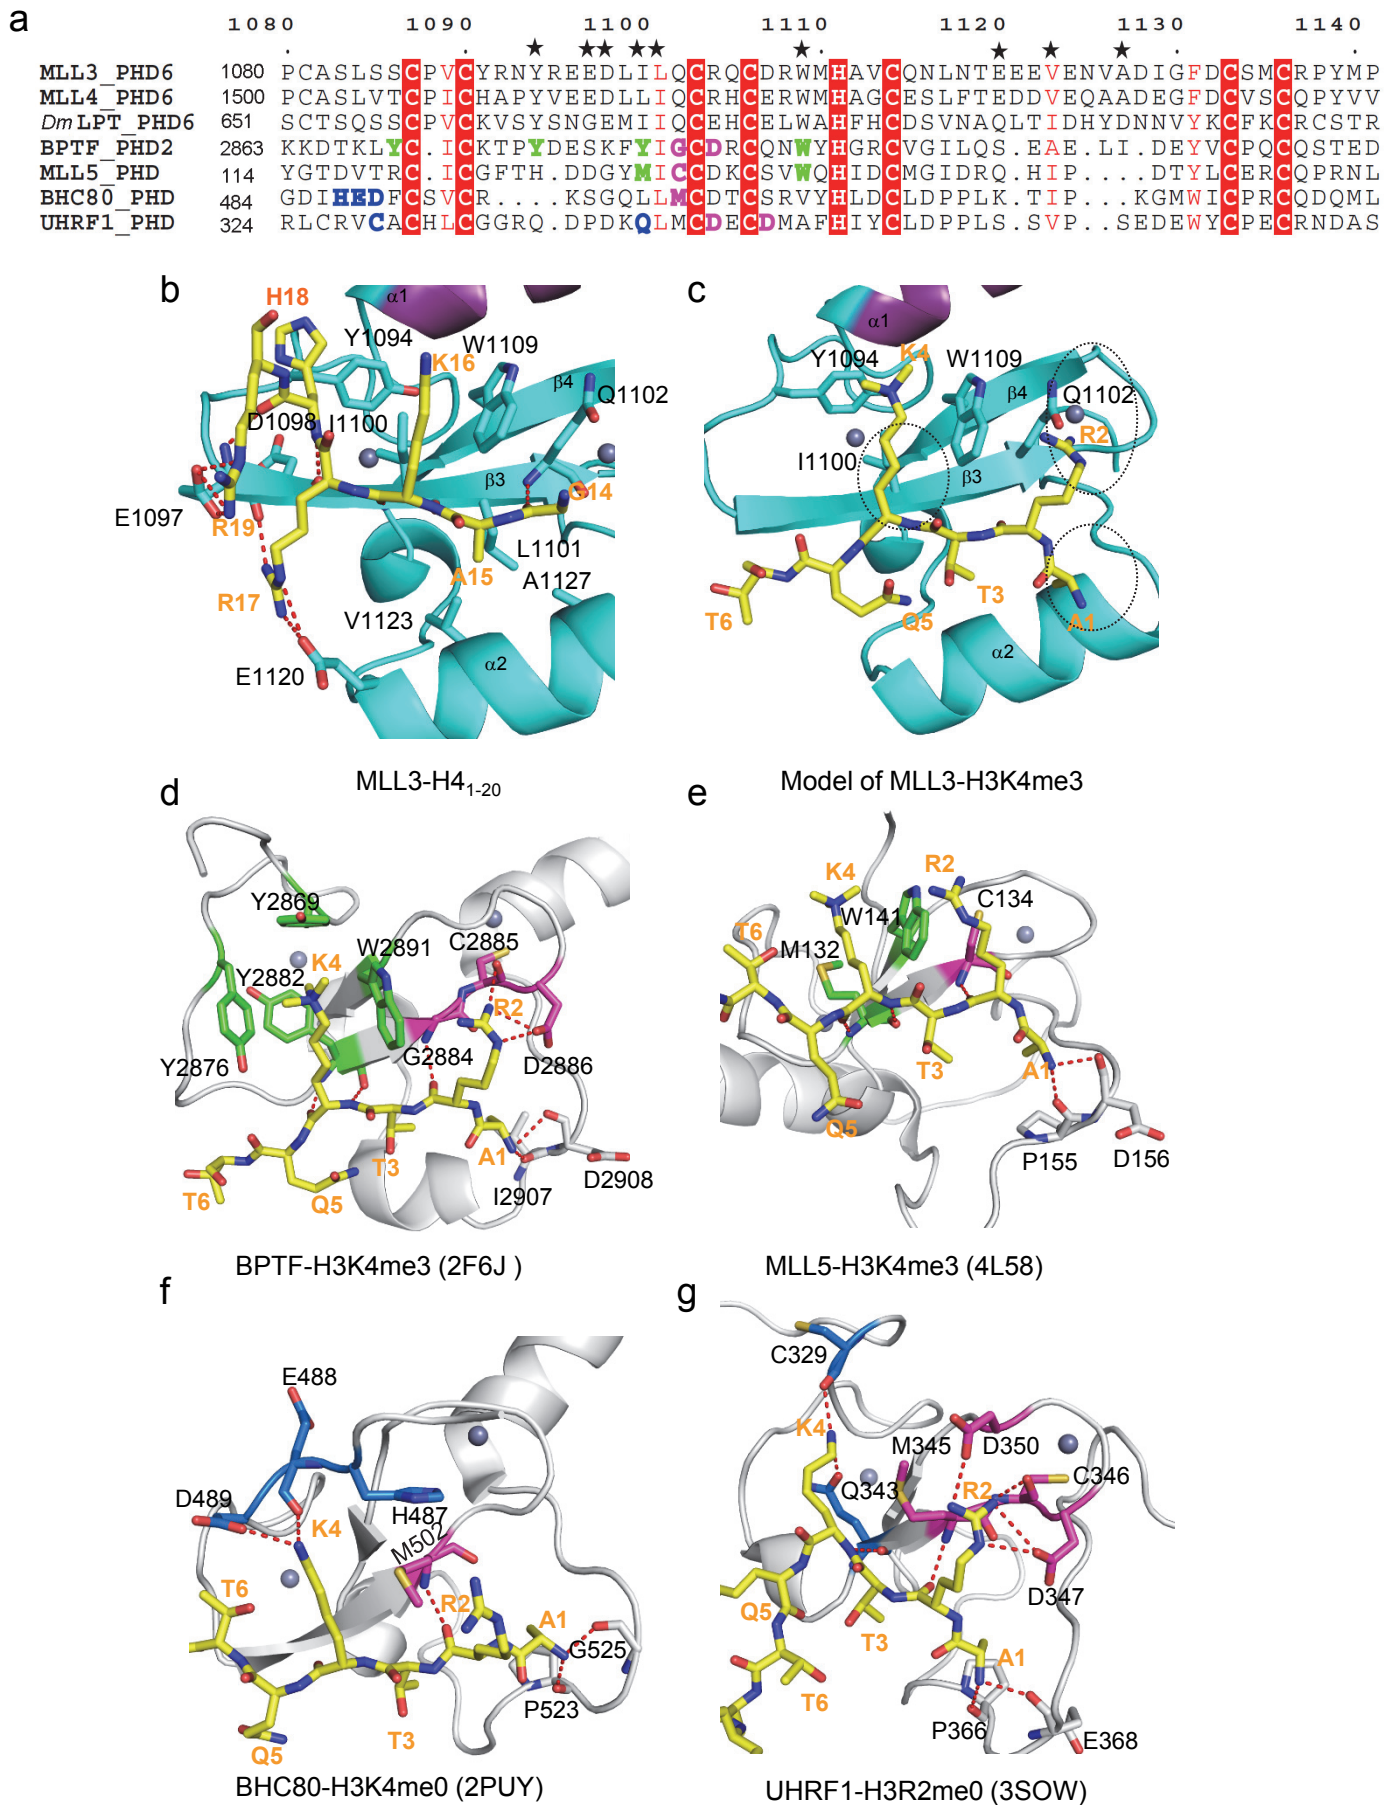

**Supplementary Fig. 5 Structural comparison to other PHD domains.** **a** Sequence alignment of different PHD domains. Residues involved in ligand binding are highlighted by black stars for MLL3 PHD6 and different colors for the other PHD domains. **b-g** Cartoon representation of different PHD domains. The bound histone peptides are shown in stick models.

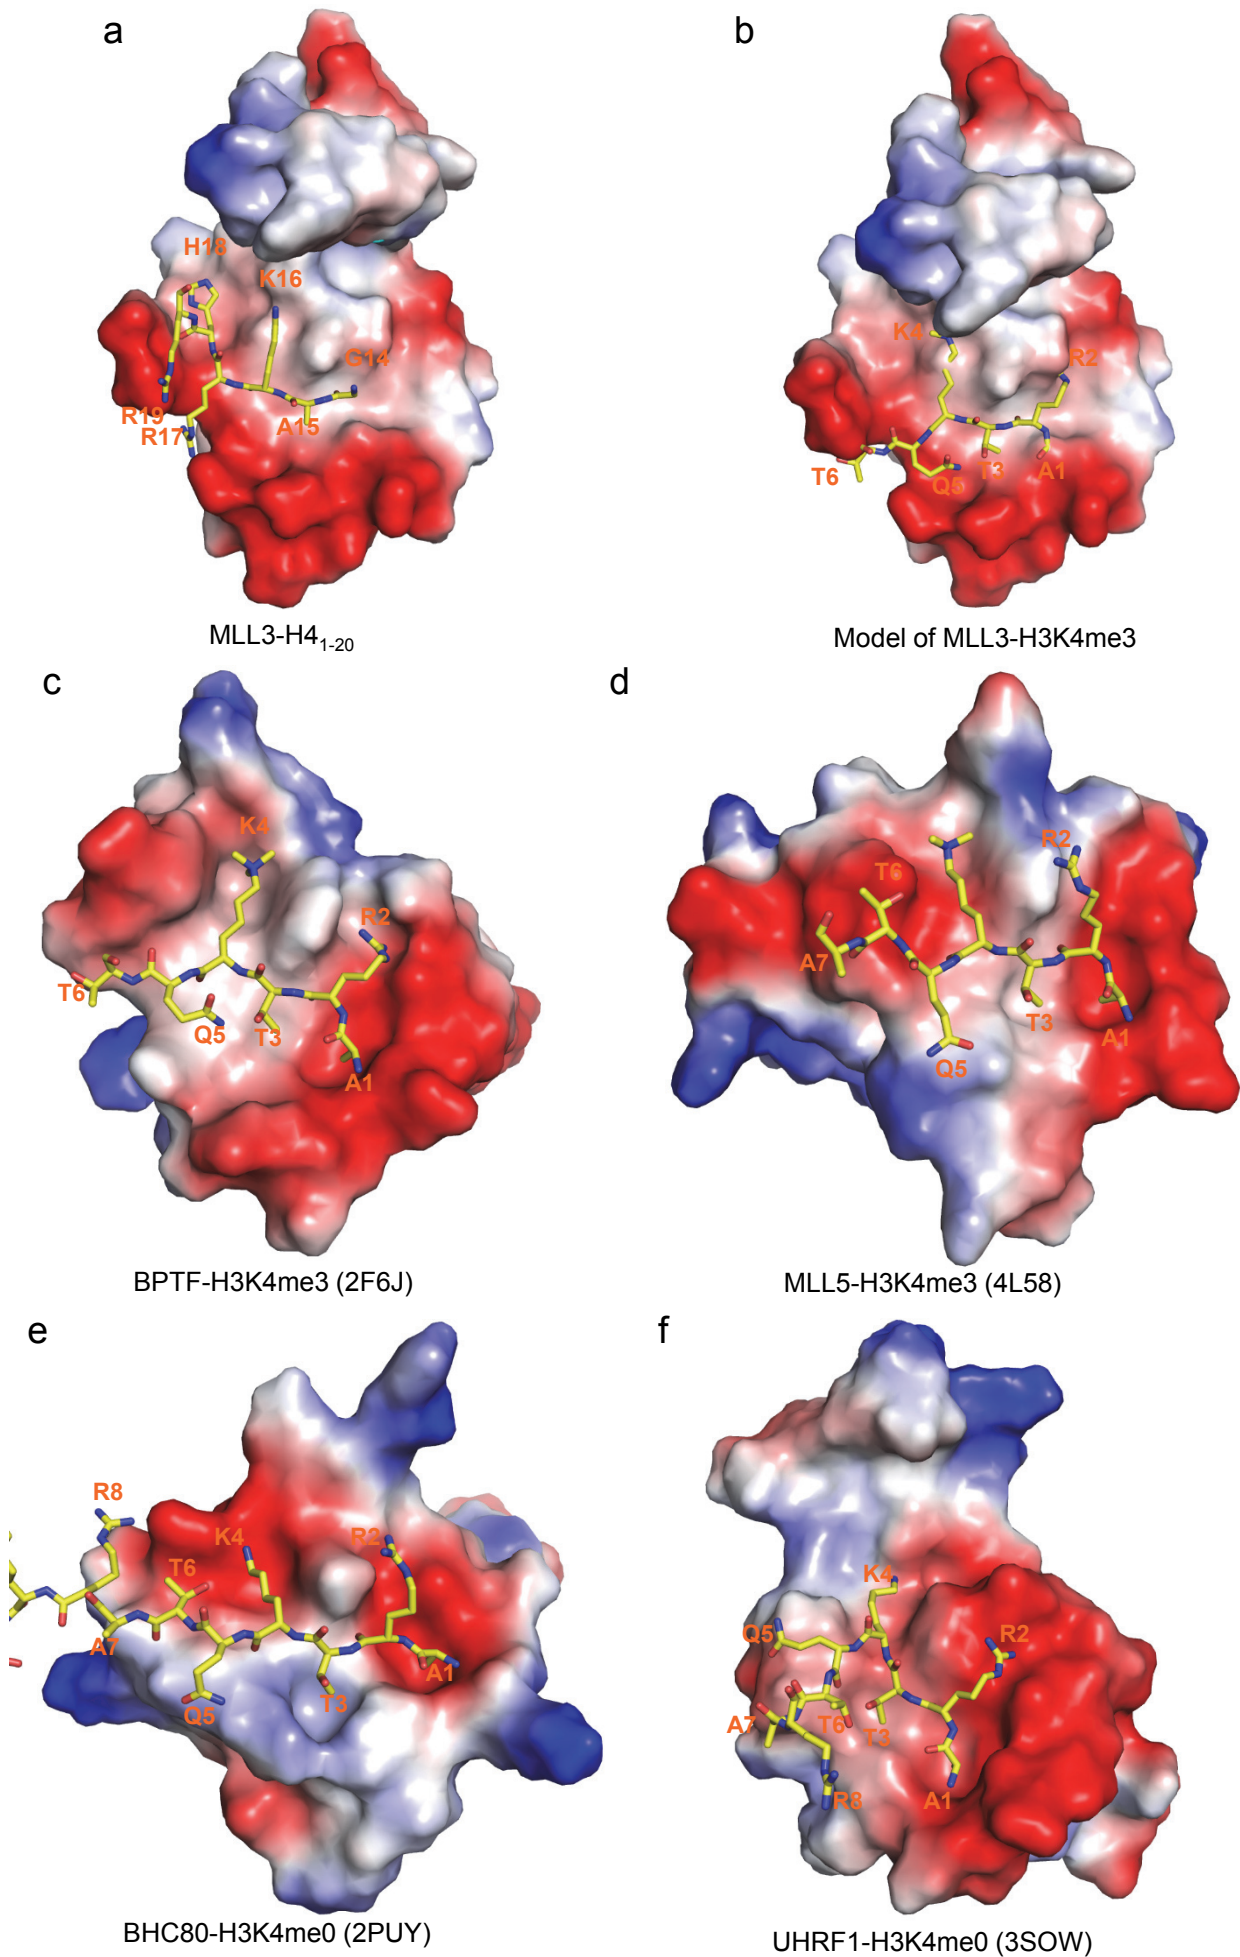

**Supplementary Fig. 6: Electrostatic surface representation of different PHD domains.**  
 The bound Peptides are shown in stick models.

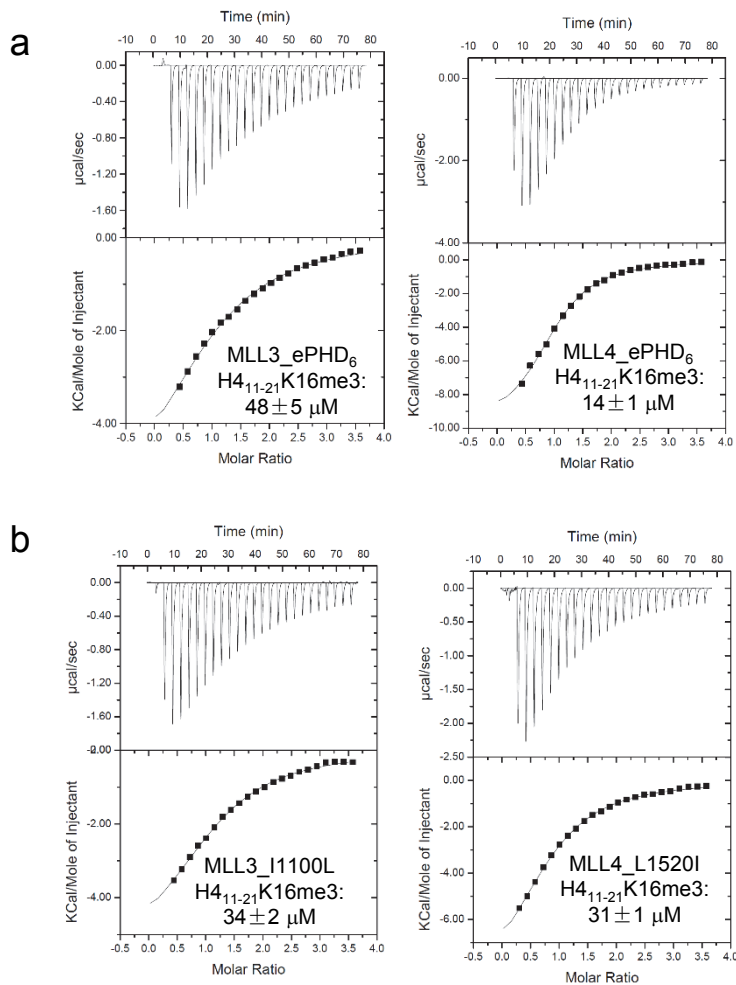

**c**

| MLL3/MLL4 constructs      | $K_d$ ( $\mu\text{M}$ )<br>H4 <sub>11-21</sub> K16me3 |
|---------------------------|-------------------------------------------------------|
| MLL3_(ePHD <sub>6</sub> ) | $48 \pm 5$                                            |
| MLL3_I1100L               | $34 \pm 2$                                            |
| MLL4_(ePHD <sub>6</sub> ) | $14 \pm 1$                                            |
| MLL4_L1520I               | $31 \pm 1$                                            |

**Supplementary Fig. 7 Trimethylation of H4K16 affects histone H4 binding to MLL3 and MLL4 differently.** ITC titration curves (**a and b**) and affinity table (**c**) for the titration of H4<sub>11-21</sub>K16me3 to the ePHD<sub>6</sub> domain of wt MLL3, MLL3\_I1100L mutant, wt MLL4 and MLL4\_L1520I mutant.



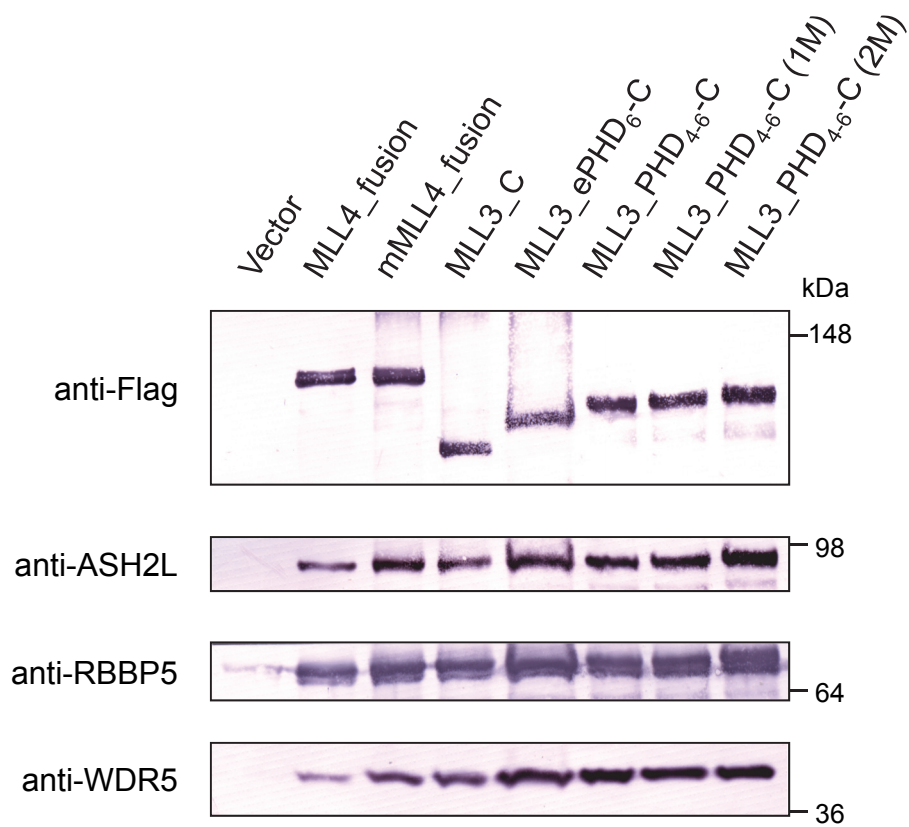

**Supplementary Fig. 8** Western blot analysis of immunoprecipitation eluates of proteins from different flag-tagged MLL3/MLL4 constructs. The antibodies used for this assays are as following:

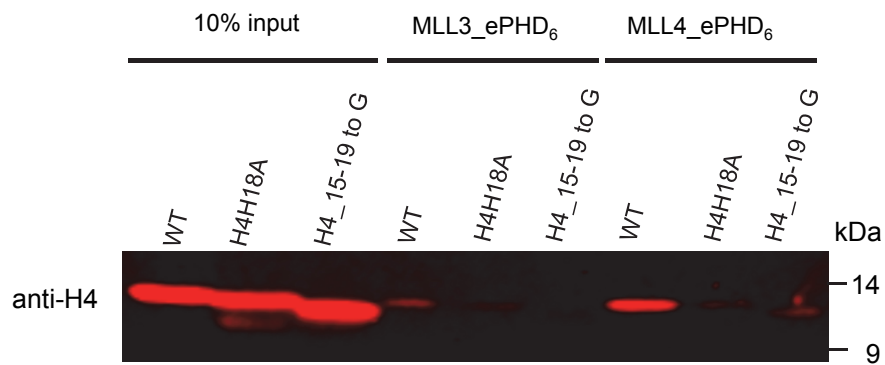

**Supplementary Fig. 9 Nucleosome pull-down assay.** Pull-down of wild type and mutant recombinant nucleosomes by GST-tagged ePHD<sub>6</sub> of MLL3/4, which was then detected by western blot analysis with anti-H4 specific antibody (Abcam, ab174628). The anti-H4 antibody is generated using the C-terminus of histone H4 as the antigen

Original scan for Fig. 3b

Long exposure for [3H]-Methyl

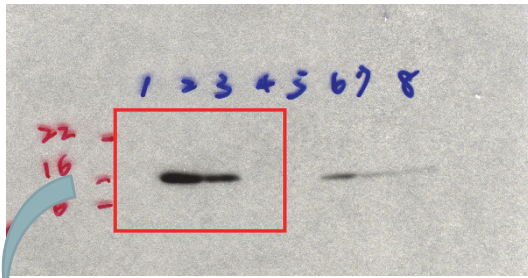

Short exposure for [3H]-Methyl

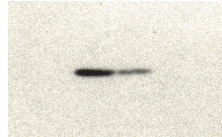

anti-FLAG

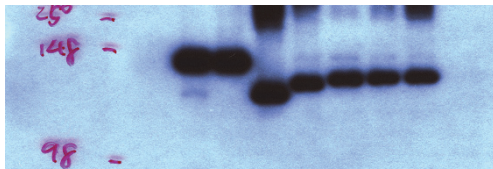

anti-H3

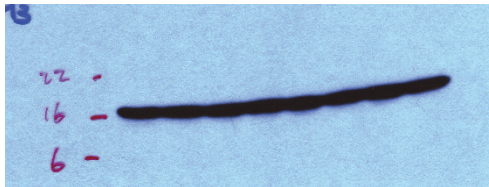

Original scan for Figure 3c

[3H]-Methyl

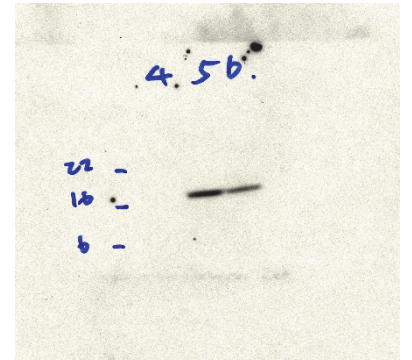

anti-FLAG

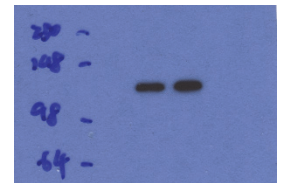

anti-H3

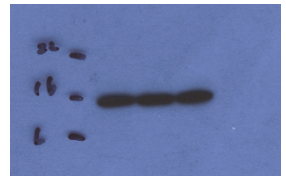

Original scan for Fig. 3d and 3e

3d

[3H]-Methyl

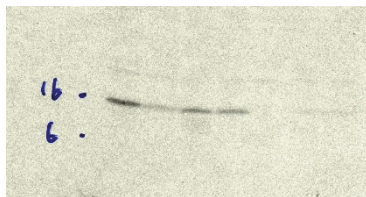

3e

[3H]-Methyl

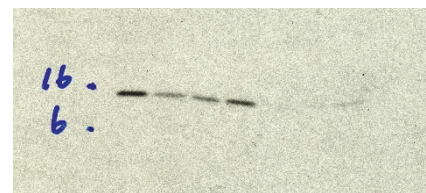

anti-H3

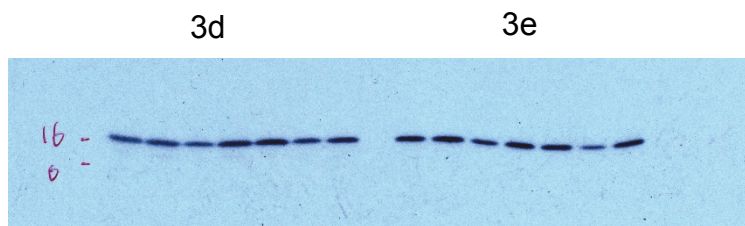

Supplementary Fig. 10 Original scan for Fig. 3

Original scan for Fig. 4a

anti-FLAG

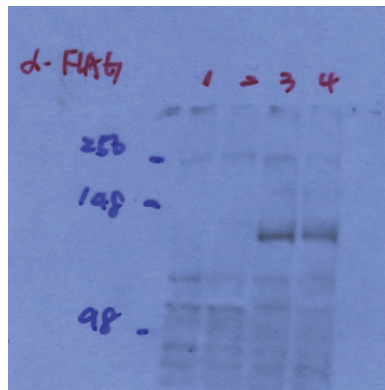

anti- $\beta$ -Actin

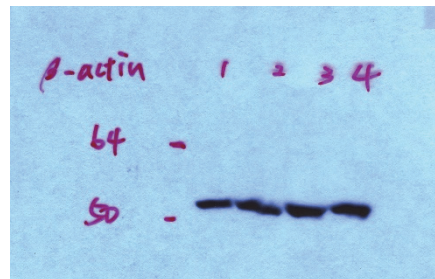

**Supplementary Fig. 11 Original scan for Fig. 4a**

Original scan for Supplementary Fig. 8

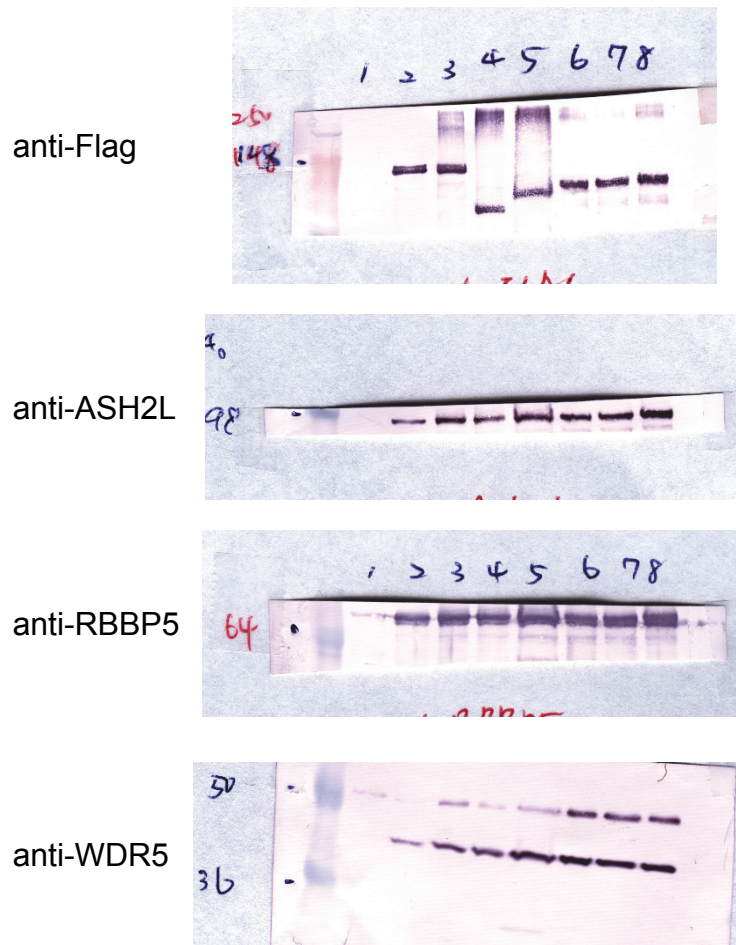

Supplementary Fig. 12 Original scan for Supplementary Fig. 8

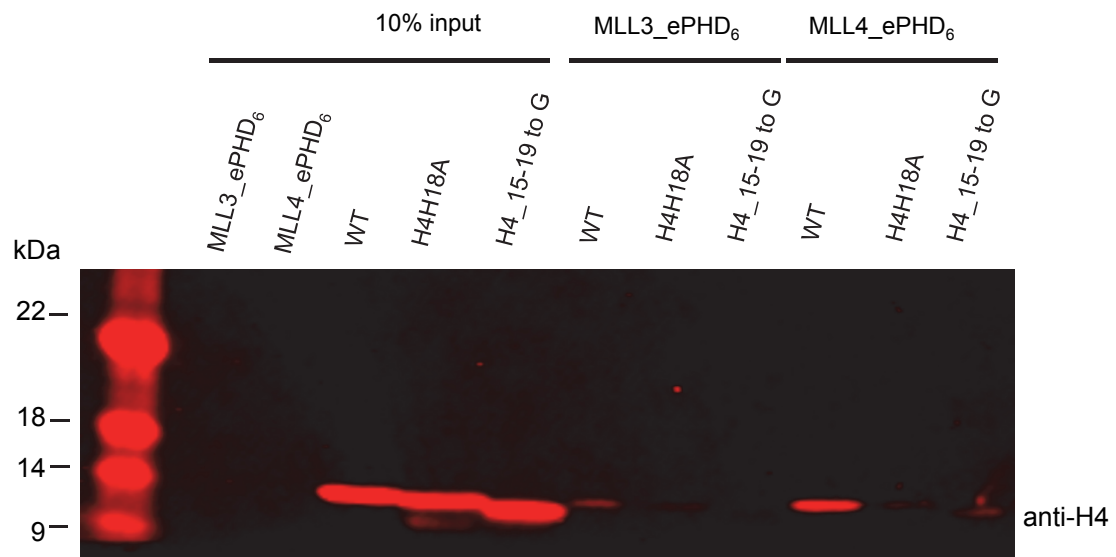

**Supplementary Fig. 13 Original scan for Supplementary Fig. 9**

Supplementary Table 1 Primer sequences

| Protein fragments                                 | Sequences                                                                            |
|---------------------------------------------------|--------------------------------------------------------------------------------------|
| <i>E. coli</i> expression constructs <sup>a</sup> |                                                                                      |
| MLL3_(ePHD <sub>6</sub> ) <sub>1055-1144</sub>    | 5': gttccgcgtgtagtGTTTGGTGCAGACACTGTGG<br>3': caagcttcgcatcaATTAGACGCAGGCATATAGGG    |
| MLL3_(ePHD <sub>6</sub> ) <sub>1075-1144</sub>    | 5': gttccgcgtgtagtTACACACAGTGCCTCCTTG<br>3': caagcttcgcatcaATTAGACGCAGGCATATAGGG     |
| MLL3_(PHD <sub>6</sub> ) <sub>1085-1144</sub>     | 5': gttccgcgtgtagtTCTTCCTGTCCAGTCTGCTATC<br>3': caagcttcgcatcaATTAGACGCAGGCATATAGGG  |
| MLL3_(PHD <sub>5</sub> ) <sub>1009-1055</sub>     | 5': gttccgcgtgtagtGTGTGTGAGGCCTGTGGGAAG<br>3': caagcttcgcatcaAACACACCATTTCACACTCCAG  |
| MLL3_(PHD <sub>5-6</sub> ) <sub>1008-1144</sub>   | 5': gttccgcgtgtagtACTGTGTGTGAGGCCTGTGG<br>3': caagcttcgcatcaATTAGACGCAGGCATATAGGG    |
| MLL3_(ePHD <sub>3</sub> ) <sub>436-525</sub>      | 5': gttccgcgtgtagtCGTATTTGCATTGAATGCGGTAC<br>3': caagcttcgcatcaATCCATTTCCGCGCCCAGATG |
| MLL4_(ePHD <sub>6</sub> ) <sub>1475-1564</sub>    | 5': gttccgcgtgtagtGTGTCCTGTATGCAGTGTGG<br>3': caagcttcgcatcaCACAGGCTTTACCACGTAGG     |
| MLL4_(ePHD <sub>6</sub> ) <sub>1495-1564</sub>    | 5': gttccgcgtgtagtTACACACACTGTGGGCCCTG<br>3': caagcttcgcatcaCACAGGCTTTACCACGTAGG     |
| MLL4_(ePHD <sub>6</sub> ) <sub>1505-1564</sub>    | 5': gttccgcgtgtagtGTGACCTGCCCTATCTGTCATG<br>3': caagcttcgcatcaCACAGGCTTTACCACGTAGG   |
| MLL4_(PHD <sub>5</sub> ) <sub>1429-1475</sub>     | 5': gttccgcgtgtagtGTGTGTGAGGTGTGTGGCC<br>3': caagcttcgcatcaCACACACCACTTGCCTCC        |
| Mutants <sup>b</sup>                              |                                                                                      |
| MLL3_ePHD <sub>6</sub> (E1097A)                   | 5': CGAAACTATAGAGAAgctGATCTTATTCTGCAA<br>3': TTGCAGAATAAGATCagcTTCTCTATAGTTTCG       |
| MLL3_ePHD <sub>6</sub> (W1109A)                   | 5': AGACAATGTGATAGAgcgATGCATGCAGTTTGT<br>3': ACAAACTGCATGCATcgcTCTATCACATTGTCT       |
| MLL3_ePHD <sub>6</sub> (E1120A)                   | 5': CAGAACTTAAATACTgcgGAAGAAGTGGAAAAT<br>3': ATTTTCCACTTCTTCcgcAGTATTTAAGTTCTG       |
| MLL4 fusion-2M                                    |                                                                                      |
| MLL4 fusion (W1529A)                              | 5': CGCCACTGTGAACGGgcgATGCATGCAGGCTG<br>3': CAGCCTGCATGCATcgcCCGTTACAGTGGCG          |
| MLL4 fusion (E1540A)                              | 5': GAGCCTCTTCACAgcgGACGATGTGGAGC<br>3': GCTCCACATCGTCcgcTGTGAAGAGGCTC               |
| Nucleosome mutants                                |                                                                                      |
| H4-1-5 to G                                       | 5': ATGggaGGCggaGGAgaGGCGGAAAAGGC<br>3': GCCTTTTCCGCCtccTCCtccGCCtccCAT              |
| H4-15-19 to G                                     | 5': GGGGGCgaggaggaggaggaaAAGGTCTTG<br>3': CAAGACCTTtctctctctctccGCCCC                |

|                                                    |                                                                                                     |
|----------------------------------------------------|-----------------------------------------------------------------------------------------------------|
| H4_R3A                                             | 5': ATGTCCGGCgcaGGAAAGGGCGGAAAAGGC<br>3': GCCTTTTCCGCCCTTTCCtgcGCCGGACAT                            |
| H4_R17A                                            | 5': AAAGGGGGCGCTAAGgccCACCGCAAGGTC<br>3': GACCTTGCGGTGggcCTTAGCGCCCCCTTT                            |
| H4_H18A                                            | 5': AAAGGGGGCGCTAAGCGCgcaCGCAAGGTC<br>3': GACCTTGCGtgcGCGCTTAGCGCCCCCTTT                            |
| <b>Mammalian expression constructs<sup>c</sup></b> |                                                                                                     |
| MLL3_C <sub>3993-4911</sub>                        | 5': cc <u>atcgata</u> GGTGATCGAGATACTCCTGAC<br>3': <u>gggtac</u> tcGTTTCATCCACTTCCGGCAGTTC          |
| MLL3_(ePHD <sub>6</sub> ) <sub>1055-1144</sub>     | 5': ataagaat <u>gcggccgcg</u> TACACACAGTGCGCTCCTTG<br>3': <u>ggaattgc</u> ATTAGACGCAGGCATATAGGG     |
| MLL3_(ePHD <sub>4-6</sub> ) <sub>939-1144</sub>    | 5': ataagaat <u>gcggccgcg</u> TCTATGCACAATACAGTTGTGTTG<br>3': <u>ggaattgc</u> ATTAGACGCAGGCATATAGGG |
| <b>Quantitative RT-PCR</b>                         |                                                                                                     |
| HOXA1                                              | 5': TTCTCCGGCCCCATGG<br>3': GAGTGACCTGGTCTCTGCGAA                                                   |
| HOXA2                                              | 5': TTTCATACCCGTAGGGCTCGG<br>3': CCCTGCTGGTAACTTCCAACAG                                             |
| HOXA3                                              | 5': TGCTTTGTGTTTTGTGCGAGACTC<br>3': CAACCCCTACCCCTGCCAAC                                            |
| NANOG                                              | 5': TTTGTGGGCCTGAAGAAAAC<br>3': AGGGCTGTCCTGAATAAGCAG                                               |
| NeuN                                               | 5': CCAAGCGGCTACACGTCTC<br>3': CGTCCCATTACGTTCTCCC                                                  |

Note: a, the lower cases of these primers are the sequences used by T4 ligase-independent cloning; b, the lower cases of these primers are the mutation sites; c, the lower cases of these primers are the sequences associated with restriction enzyme sites, *Not* I at 5' primer and *Eco*R I at 3' primer for the PHD constructs and *Cla* I at 5' primer and *Kpn* I at 3' primer for the C terminal of MLL3 construct.
